# Supplementary material for: Internal and external morphology-dependent plasmonic resonance in monolithic nanoporous gold nanoparticles
Source: Royal Society of Chemistry journal article supplement (doi:10.1039/c4ra04922e), 2014-01-01
Supplement: c4ra04922e1.pdf [file c4ra04922e1.pdf]

## Electronic Supplementary Information (ESI) for

### Internal and external morphology-dependent plasmonic resonance in monolithic nanoporous gold nanoparticles

#### 1. XPS analysis

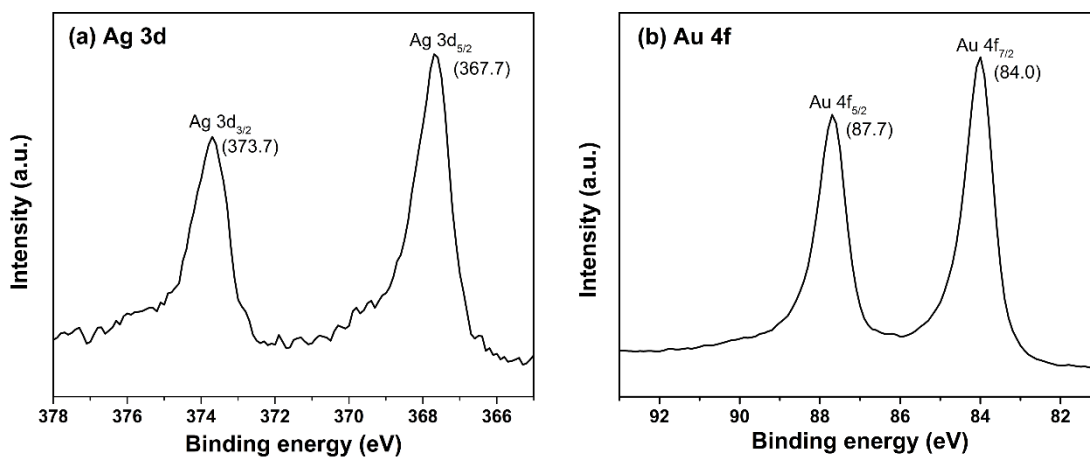

**Figure S1** XPS spectra of NPG disks with 17.5% Au composition dealloyed at 270 s: (a) Ag 3d and (b) Au 4f.

## 2. Atomic percentage changes of NPG disks from $\text{Ag}_{70}\text{Au}_{30}$ alloy

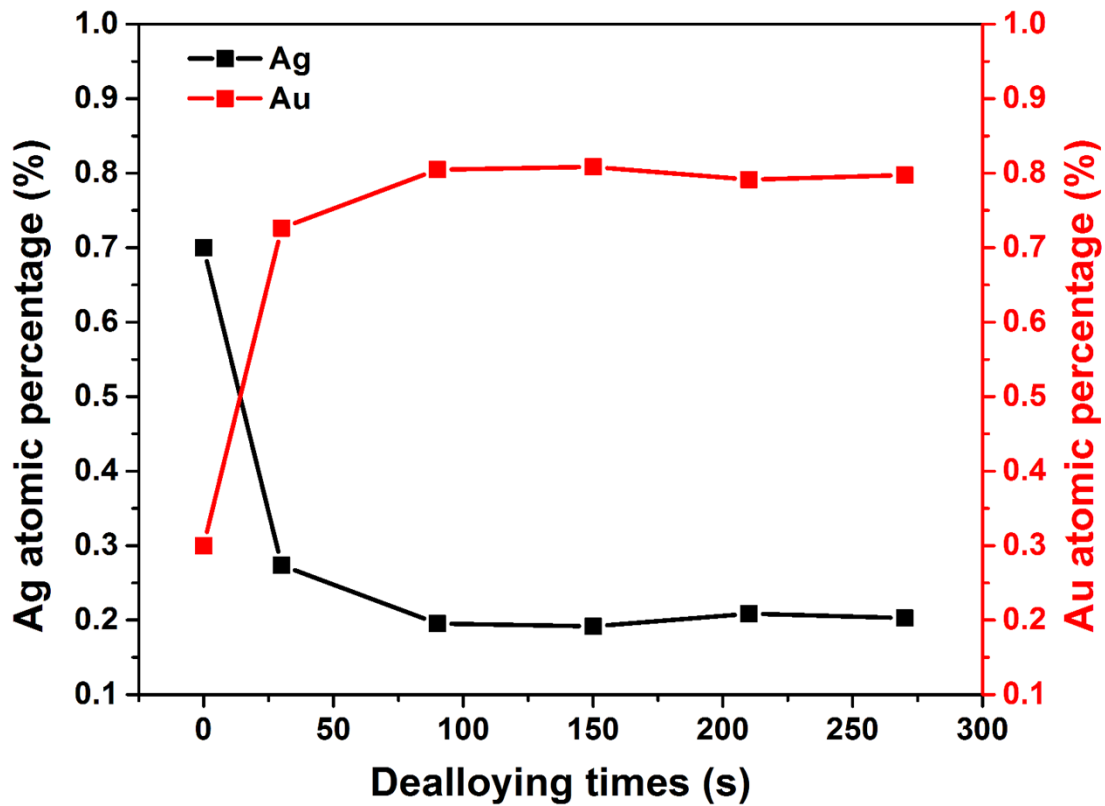

Figure S2 NPG disks made from  $\text{Ag}_{70}\text{Au}_{30}$  alloy: atomic percentage of Ag and Au versus dealloying time.

### 3. NPG disks thermal annealing

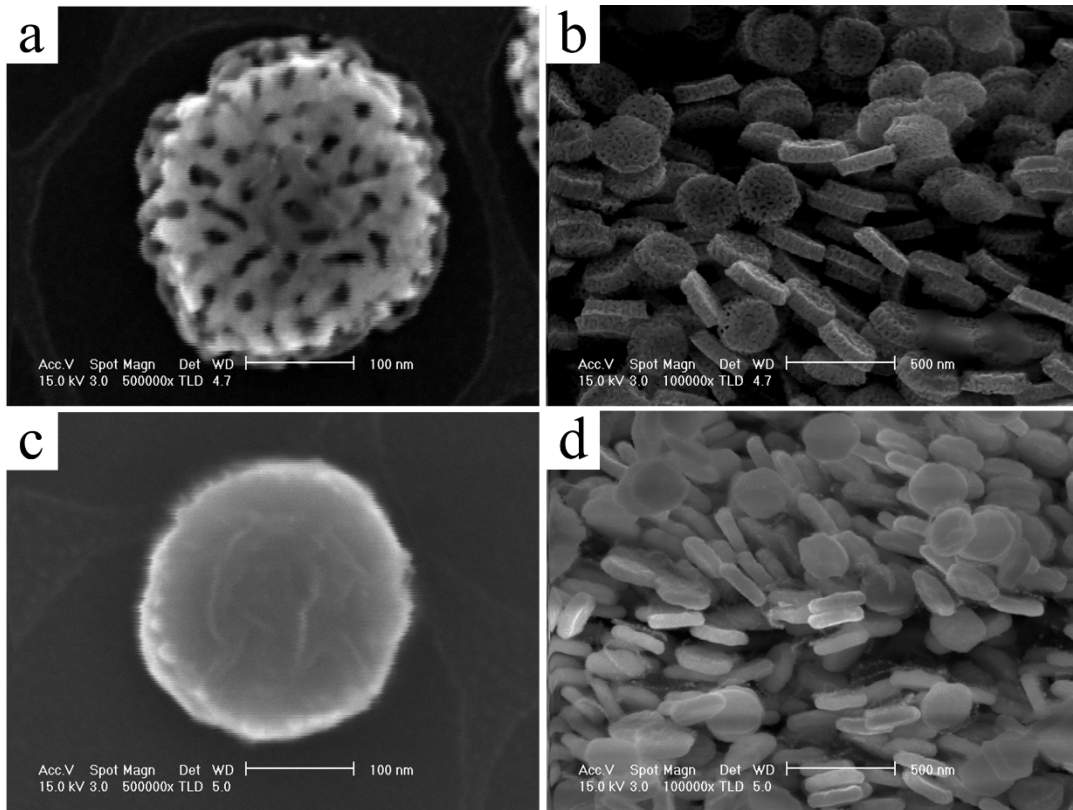

**Figure S3** SEM images of NPG disks with 17.5% Au composition at 23 °C (a) and (b); thermal annealing at 500 °C (c) and (d).
